# Supplementary material
Source: PubMed Central journal article supplement (PMC8094202)
Supplement: CYTO-97-199-s002.pdf [file CYTO-97-199-s002.pdf]

**Cytometry Part A**  
**Author Checklist: MIFlowCyt-Compliant Items**

| <b>Requirement</b>                                     | <b>Please Include Requested Information</b>                                                                                                                                                                                                                                                                                                       |
|--------------------------------------------------------|---------------------------------------------------------------------------------------------------------------------------------------------------------------------------------------------------------------------------------------------------------------------------------------------------------------------------------------------------|
| 1.1. Purpose                                           | This panel was developed, optimized and qualified for the assessment of human antigen-specific T-cell responses by intracellular cytokine staining, including memory/differentiation markers. Multiple T cell lineages are identified including classical CD4+, CD8+, and gd, MAIT, and NK T. Additionally NK- cell responses are also evaluated. |
| 1.2. Keywords                                          | Cytometry, human PBMC, T cells, MAIT cells, gd T cells, NK cells, memory, intracellular cytokine staining                                                                                                                                                                                                                                         |
| 1.3. Experiment variables                              | Frequency of cytokine expressing cells of various phenotypes                                                                                                                                                                                                                                                                                      |
| 1.4. Organization name and address                     | Vaccine and Infectious Disease Division, Fred Hutchinson Cancer Research Center, Seattle, WA 98109 USA                                                                                                                                                                                                                                            |
| 1.5. Primary contact name and email address            | Stephen De Rosa, sderosa@fredhutch.org                                                                                                                                                                                                                                                                                                            |
| 1.6. Date or time period of experiment                 | January 2017- July 2018                                                                                                                                                                                                                                                                                                                           |
| 1.7. Conclusions                                       | Development, optimization and cross-validation of 26-color ICS panel                                                                                                                                                                                                                                                                              |
| 1.8. Quality control measures                          | Fluorescence Minus One tests<br>Unstimulated control for each sample, same cryopreserved PBMC sample used as control for each experiment<br>Rainbow 6 <sup>th</sup> peak and Supra beads standardize instrument                                                                                                                                   |
| 2.1.1.1. (2.1.2.1., 2.1.3.1.) Sample description       | Cryopreserved peripheral blood mononuclear cells                                                                                                                                                                                                                                                                                                  |
| 2.1.1.2. Biological sample source description          | Human                                                                                                                                                                                                                                                                                                                                             |
| 2.1.1.3. Biological sample source organism description | Human adults                                                                                                                                                                                                                                                                                                                                      |
| 2.1.2.2. Environmental sample location                 | Not applicable                                                                                                                                                                                                                                                                                                                                    |
| 2.3. Sample treatment description                      | 6-hour ex vivo stimulation of PBMC with DMSO (negative control), SEB (positive control) or peptide pools to various proteins (from HIV, TB)                                                                                                                                                                                                       |
| 2.4. Fluorescence reagent(s) description               | See Table 2 and Online Table 2                                                                                                                                                                                                                                                                                                                    |
| 3.1. Instrument manufacturer                           | Becton Dickinson (BD)                                                                                                                                                                                                                                                                                                                             |
| 3.2. Instrument model                                  | FACSymphony A5                                                                                                                                                                                                                                                                                                                                    |
| 3.3. Instrument configuration and settings             | 5 lasers, 28-colors. See Online Table 1                                                                                                                                                                                                                                                                                                           |
| 4.1. List-mode data files                              | Example of sample staining for SEB, DMSO negative control and compensation samples are available in <a href="http://flowrepository.org">http://flowrepository.org</a><br><br>Repository identifier:<br>FR-FCM-Z2DD                                                                                                                                |
| 4.2. Compensation description                          | Single-stained cell and/or capture bead samples, software compensation in FlowJo                                                                                                                                                                                                                                                                  |
| 4.3. Data transformation details                       | Biexponential transformation (Custom transformation and Manually Specify transformation options) in FlowJo                                                                                                                                                                                                                                        |
| 4.4.1. Gate description                                | Hierarchical gating to identify lineages and then one dimensional gates on each cytokine and memory/activation marker, see Figure 1 and Online Figure                                                                                                                                                                                             |

|                        |              |
|------------------------|--------------|
|                        | 4            |
| 4.4.2. Gate statistics | See Figure 1 |
| 4.4.3. Gate boundaries | See Figure 1 |

**Notes**

Feel free to use more space than allocated.

You can embed graphics/figures in this document, if needed.

Please make sure to save the document in Microsoft Word version 2003 or older, before uploading to ScholarOne Manuscripts. When uploading this checklist to ScholarOne Manuscripts, please choose the “Supplementary Material for Review” category.

Please note that if your paper is accepted, the checklist will be published as an Online Supporting Information.

For any questions, please contact the Cytometry Part A editorial office at [Cytometry@wiley.com](mailto:Cytometry@wiley.com).
